# Supplementary material for: Individual Risk Assessment for Population Living on the Territories Long-Term Polluted by Organochlorine Pesticides
Source: MDPI journal article supplement (doi:10.3390/toxics11060482), 2023-05-25
Supplement: s1 [file s1]

# Supplementary Materials

Figure S1: Questionnaires used for survey of people.

Name

Sex

☐ male

☐ female

Age

How long have you been living in this village?

☐ less than 1 year

☐ 1-5 years

☐ 6-10 years

☐ 60 and 10 /ner

How many times a day do you eat?

|             | Several times a day | Once a day | Few times a week | Less often | Don't eat at all |
|-------------|---------------------|------------|------------------|------------|------------------|
| Meat        |                     |            |                  |            |                  |
| Cucumbers   |                     |            |                  |            |                  |
| Tomatoes    |                     |            |                  |            |                  |
| Bell pepper |                     |            |                  |            |                  |
| Apples      |                     |            |                  |            |                  |
| Pears       |                     |            |                  |            |                  |
| Milk        |                     |            |                  |            |                  |
| Honey       |                     |            |                  |            |                  |

What seasons are more typical for your products consumption:

|             | Winter | Spring | Summer | Autumn |
|-------------|--------|--------|--------|--------|
| Meat        |        |        |        |        |
| Cucumbers   |        |        |        |        |
| Tomatoes    |        |        |        |        |
| Bell pepper |        |        |        |        |
| Apples      |        |        |        |        |
| Pears       |        |        |        |        |
| Milk        |        |        |        |        |
| Honey       |        |        |        |        |

Please indicate how much food (in grams/liters) do you purchase on average:

1. Meat:

2. Cucumbers:

3. Tomatoes:

4. Bell pepper:

5. Apples:

6. Pears:

7. Milk:

8. Honey

How do you process fruits and vegetables before eating?

☐ Don't wash and clean

☐ Wash but don't clean

☐ Clean but don't wash

☐ Wash and clean

What size is your usual portion of meat (in grams)?

☐ 20-30 g.

☐ 50 g.

☐ 100-120 g.

☐ 300-400 g.

☐ 500 g. and more

How many cucumbers do you eat at a time / use for cooking?

☐ 1 piece

☐ 2 pieces

☐ 3 pieces

☐ 4 pieces

☐ 5 and more

How many tomatoes do you eat at a time / use for cooking?

☐ 1 piece

☐ 2 pieces

☐ 3 pieces

☐ 4 pieces

☐ 5 and more

How many bell peppers do you eat at a time / use for cooking?

☐ 1 piece

☐ 2 pieces

☐ 3 pieces

☐ 4 pieces

☐ 5 and more

How many apples do you eat at a time / use for cooking?

☐ 1 piece

☐ 2 pieces

☐ 3 pieces

☐ 4 pieces

☐ 5 and more

How many pears do you eat at a time / use for cooking?

☐ 1 piece

☐ 2 pieces

☐ 3 pieces

☐ 4 pieces

☐ 5 and more

How much milk do you consume at a time / use for cooking?

- ☐ 1 glass  
☐ 2 glasses  
☐ 3 glasses  
☐ 4 glasses  
☐ 5 and more

Questions, wishes or comments about the quality of the products you consume and notes about health issues:

---



---



---

How much honey do you consume at a time / use for cooking?

- ☐ 1 tea spoon  
☐ 2 tea spoons  
☐ 3 tea spoons  
☐ 4 tea spoons  
☐ 5 and more

How far is the source of foodstuffs from home?:

|             | Own plot /<br>farm | Neighboring<br>plot: farm | Mobile stall | Shop<br>near<br>home | Shop<br>close to<br>home | Shop<br>far<br>from<br>home | Products<br>are<br>brought<br>from<br>another<br>locality |
|-------------|--------------------|---------------------------|--------------|----------------------|--------------------------|-----------------------------|-----------------------------------------------------------|
| Meat        |                    |                           |              |                      |                          |                             |                                                           |
| Cucumbers   |                    |                           |              |                      |                          |                             |                                                           |
| Tomatoes    |                    |                           |              |                      |                          |                             |                                                           |
| Bell pepper |                    |                           |              |                      |                          |                             |                                                           |
| Apples      |                    |                           |              |                      |                          |                             |                                                           |
| Pears       |                    |                           |              |                      |                          |                             |                                                           |
| Milk        |                    |                           |              |                      |                          |                             |                                                           |
| Honey       |                    |                           |              |                      |                          |                             |                                                           |

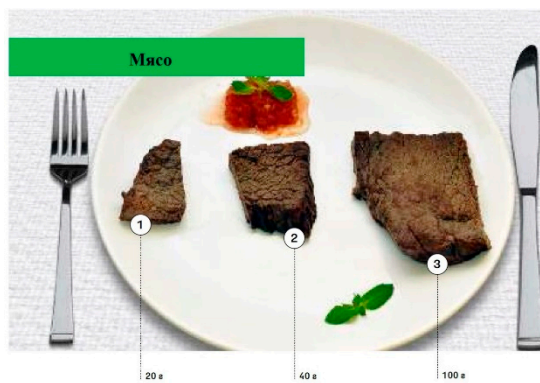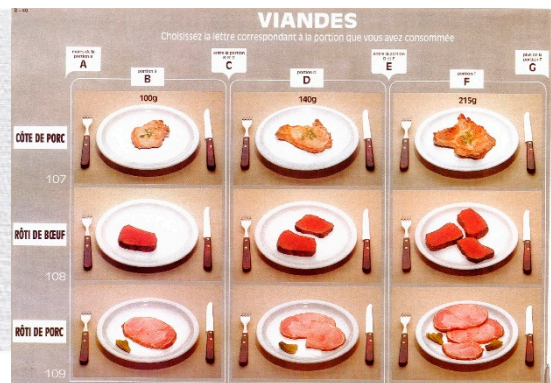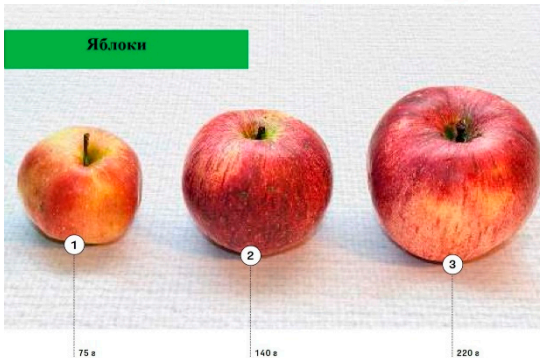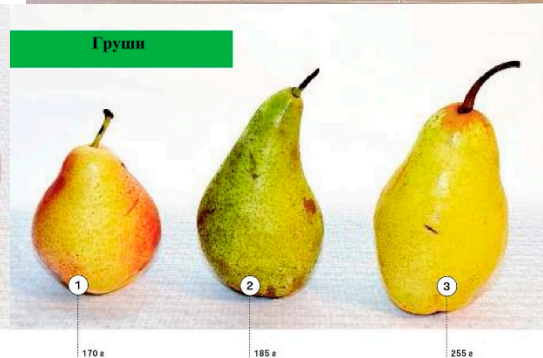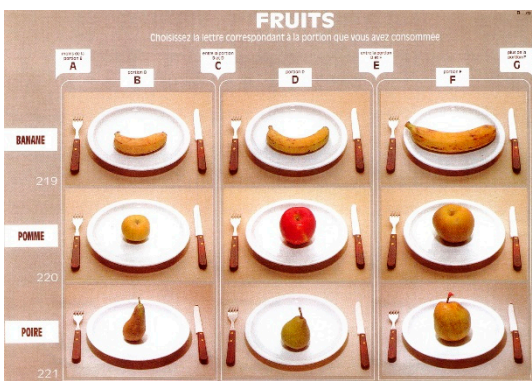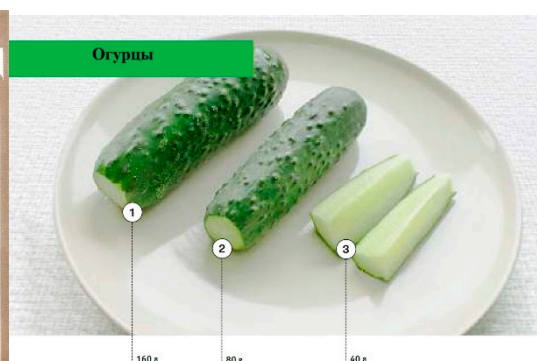

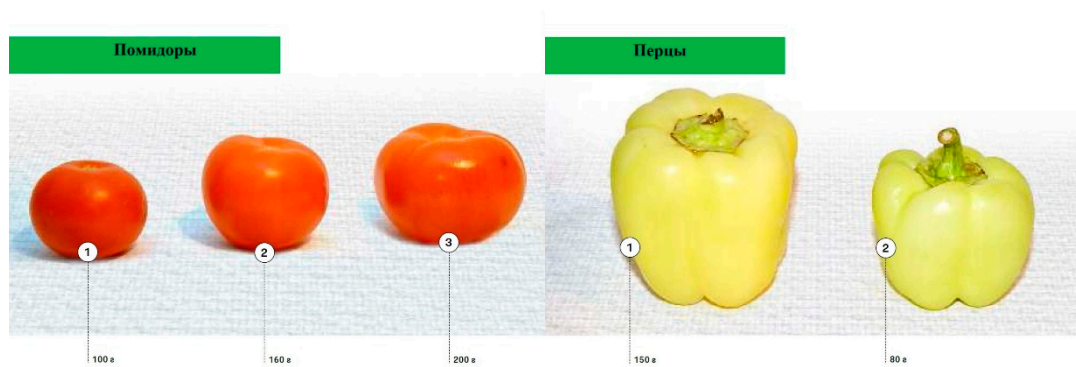

Table S1: Full data of the survey in villages of Talgar and Dzhambyl regions.

| Village | Code  | Year of birth | Age | Sex    | Body weight, kg | Excess in food | Pesticide Excess | Excess for heavy metals | Reparation system assessment | Detoxification system assessment | Antioxidant protection system assessment | Smoke | Drink |
|---------|-------|---------------|-----|--------|-----------------|----------------|------------------|-------------------------|------------------------------|----------------------------------|------------------------------------------|-------|-------|
| KK      | ПЦ-31 | 1974          | 46  | male   | 76,2            | 1,14           | 0,274            | 0,067                   | 1                            | 0                                | 0                                        | 0     | 1     |
| KK      | ПЦ-32 | 1984          | 36  | female | 71,5            | 1,00           | 0,117            | 0,094                   | 0                            | 0                                | 1                                        | 0     | 0     |
| KK      | ПЦ-35 | 1987          | 33  | male   | 71,8            | 3,29           | 0,854            | 3,486                   | 0                            | 1                                | 1                                        | 1     | 0     |
| KK      | ПЦ-36 | 1960          | 60  | male   | 77,5            | 1,86           | 0,464            | 0,770                   | 0                            | 1                                | 0                                        | 1     | 0     |
| KK      | ПЦ-37 | 1987          | 33  | female | 72,9            | 2,43           | 0,830            | 0,781                   | 0                            | 2                                | 0                                        | 0     | 0     |
| KK      | ПЦ-38 | 1988          | 32  | male   | 70              | 0,71           | 0,259            | 0,075                   | 0                            | 2                                | 0                                        | 0     | 0     |
| KK      | ПЦ-39 | 1958          | 62  | female | 64              | 3,29           | 1,164            | 3,621                   | 1                            | 1                                | 0                                        | 0     | 1     |
| KK      | ПЦ-40 | 1967          | 53  | female | 51,6            | 1,57           | 0,092            | 0,166                   | 0                            | 0                                | 0                                        | 0     | 0     |
| KK      | ПЦ-41 | 1955          | 65  | female | 64,4            | 1,71           | 0,226            | 1,158                   | 0                            | 1                                | 0                                        | 0     | 0     |
| KK      | ПЦ-42 | 1986          | 34  | female | 60              | 1,71           | 0,127            | 0,638                   | 1                            | 1                                | 0                                        | 0     | 0     |
| KK      | ПЦ-43 | 1991          | 29  | female | 62,4            | 1,29           | 0,076            | 0,138                   | 1                            | 2                                | 0                                        | 0     | 0     |
| KK      | ПЦ-44 | 1947          | 73  | male   | 50,2            | 2,29           | 0,374            | 0,291                   | 0                            | 1                                | 0                                        | 1     | 1     |
| KK      | ПЦ-46 | 1948          | 72  | female | 73,3            | 0,43           | 0,125            | 0,044                   | 0                            | 2                                | 0                                        | 0     | 1     |

|    |        |      |    |        |      |      |       |       |   |   |   |   |   |
|----|--------|------|----|--------|------|------|-------|-------|---|---|---|---|---|
| KK | ПЦ-47  | 1963 | 57 | female | 54,4 | 1,14 | 0,266 | 0,238 | 1 | 1 | 0 | 0 | 0 |
| KK | ПЦ-48  | 1991 | 29 | female | 60   | 3,00 | 0,380 | 2,018 | 1 | 1 | 0 | 0 | 0 |
| KK | ПЦ-50  | 1957 | 63 | female | 80   | 0,43 | 0,102 | 0,055 | 0 | 1 | 1 | 0 | 0 |
| KK | ПЦ-51  | 1955 | 65 | female | 71,4 | 3,00 | 0,578 | 1,223 | 0 | 0 | 0 | 0 | 0 |
| KK | ПЦ-52  | 1955 | 65 | male   | 94,1 | 0,43 | 0,087 | 0,047 | 0 | 0 | 1 | 0 | 0 |
| KK | ПЦ-53  | 1964 | 56 | female | 93,6 | 1,29 | 0,157 | 0,187 | 0 | 3 | 1 | 0 | 0 |
| KK | ПЦ-54  | 1951 | 69 | female | 60   | 1,71 | 0,115 | 0,429 | 0 | 0 | 1 | 0 | 1 |
| KK | ПЦ-57  | 1972 | 48 | female | 62,7 | 2,14 | 0,135 | 0,505 | 0 | 1 | 0 | 0 | 1 |
| KK | ПЦ-59  | 1947 | 73 | female | 80,6 | 1,57 | 0,091 | 0,204 | 0 | 1 | 1 | 0 | 0 |
| KK | ПЦ-60  | 1969 | 51 | male   | 63,5 | 1,71 | 0,115 | 0,258 | 0 | 1 | 1 | 1 | 0 |
| KK | ПЦ-62  | 1980 | 40 | female | 82,4 | 1,57 | 0,089 | 0,223 | 0 | 2 | 1 | 0 | 0 |
| BB | ПЦ-94  | 1958 | 62 | male   | 97,3 | 1,86 | 0,266 | 1,065 | 0 | 0 | 0 | 0 | 0 |
| BB | ПЦ-96  | 1942 | 78 | female | 67,3 | 2,00 | 0,095 | 1,273 | 2 | 2 | 0 | 0 | 0 |
| BB | ПЦ-97  | 1952 | 68 | female | 60   | 1,14 | 0,111 | 0,491 | 0 | 2 | 0 | 0 | 0 |
| BB | ПЦ-98  | 1966 | 54 | female | 60   | 2,29 | 0,344 | 1,948 | 1 | 1 | 1 | 0 | 0 |
| BB | ПЦ-99  | 1972 | 48 | female | 68,3 | 1,71 | 0,121 | 0,812 | 0 | 1 | 0 | 0 | 0 |
| BB | ПЦ-100 | 1963 | 57 | female | 81,3 | 2,14 | 0,088 | 1,314 | 0 | 3 | 1 | 0 | 0 |
| BB | ПЦ-101 | 1957 | 63 | female | 60   | 1,43 | 0,097 | 0,494 | 1 | 1 | 1 | 0 | 0 |
| BB | ПЦ-102 | 1986 | 34 | female | 95,1 | 1,57 | 0,082 | 0,486 | 2 | 1 | 0 | 0 | 0 |
| BB | ПЦ-104 | 2004 | 16 | male   | 70   | 1,71 | 0,087 | 0,489 | 1 | 0 | 0 | 0 | 0 |
| BB | ПЦ-106 | 1970 | 50 | female | 76   | 1,43 | 0,164 | 0,507 | 1 | 1 | 0 | 0 | 0 |

|    |        |      |    |        |       |      |       |       |   |   |   |   |   |
|----|--------|------|----|--------|-------|------|-------|-------|---|---|---|---|---|
| BB | ПЦ-107 | 1960 | 60 | female | 65,3  | 2,00 | 0,122 | 0,641 | 1 | 0 | 1 | 0 | 0 |
| BB | ПЦ-108 | 1949 | 71 | female | 89,2  | 1,57 | 0,072 | 0,423 | 1 | 1 | 0 | 0 | 0 |
| BB | ПЦ-111 | 1990 | 30 | female | 42,4  | 2,29 | 0,484 | 2,756 | 0 | 1 | 0 | 0 | 0 |
| BB | ПЦ-112 | 2003 | 17 | male   | 70    | 2,00 | 0,103 | 0,961 | 1 | 1 | 0 | 0 | 0 |
| BB | ПЦ-113 | 1963 | 57 | female | 57,9  | 2,29 | 0,354 | 2,019 | 0 | 1 | 0 | 0 | 0 |
| BB | ПЦ-114 | 1981 | 39 | female | 146,9 | 2,00 | 0,045 | 0,269 | 0 | 2 | 0 | 0 | 0 |
| BB | ПЦ-115 | 1965 | 55 | female | 76,6  | 1,29 | 0,095 | 0,976 | 2 | 1 | 0 | 0 | 0 |
| BB | ПЦ-116 | 1975 | 45 | female | 59,8  | 2,14 | 0,140 | 1,999 | 1 | 2 | 0 | 0 | 0 |
| BB | ПЦ-117 | 1973 | 47 | female | 70,5  | 2,14 | 0,267 | 1,190 | 0 | 1 | 0 | 0 | 0 |
| BB | ПЦ-118 | 1971 | 49 | female | 83,7  | 2,14 | 0,131 | 1,264 | 0 | 1 | 0 | 0 | 1 |
| BB | ПЦ-119 | 1994 | 26 | female | 67,4  | 2,29 | 0,279 | 1,245 | 1 | 2 | 0 | 0 | 0 |
| BK | ПЦ-63  | 1957 | 63 | female | 66    | 2,86 | 1,733 | 1,944 | 0 | 1 | 0 | 1 | 0 |
| BK | ПЦ-64  | 1959 | 61 | female | 79,3  | 2,71 | 1,110 | 0,996 | 1 | 0 | 1 | 0 | 0 |
| BK | ПЦ-65  | 1960 | 60 | female | 74,3  | 2,86 | 0,466 | 0,417 | 0 | 1 | 0 | 0 | 0 |
| BK | ПЦ-66  | 1961 | 59 | male   | 94,8  | 2,86 | 1,636 | 1,676 | 1 | 1 | 0 | 0 | 1 |
| BK | ПЦ-67  | 1956 | 64 | male   | 98,5  | 2,57 | 0,367 | 0,317 | 0 | 1 | 0 | 1 | 1 |
| BK | ПЦ-68  | 1968 | 52 | male   | 72,2  | 3,29 | 1,440 | 1,424 | 0 | 3 | 0 | 0 | 0 |
| BK | ПЦ-69  | 1968 | 52 | female | 60    | 3,29 | 1,657 | 1,699 | 1 | 1 | 0 | 0 | 0 |
| BK | ПЦ-70  | 1971 | 49 | female | 60    | 2,57 | 1,051 | 1,093 | 0 | 2 | 0 | 0 | 0 |
| BK | ПЦ-71  | 1969 | 51 | female | 99    | 1,43 | 0,190 | 0,199 | 0 | 2 | 0 | 0 | 0 |
| BK | ПЦ-74  | 1951 | 69 | male   | 59    | 3,29 | 1,367 | 1,309 | 0 | 1 | 0 | 1 | 0 |

|    |        |      |    |        |       |      |       |       |   |   |   |   |   |
|----|--------|------|----|--------|-------|------|-------|-------|---|---|---|---|---|
| BK | ПЦ-75  | 1964 | 56 | female | 92,1  | 1,71 | 0,125 | 0,083 | 0 | 1 | 1 | 0 | 0 |
| BK | ПЦ-76  | 1957 | 63 | female | 59,3  | 3,00 | 1,129 | 1,173 | 0 | 1 | 1 | 0 | 0 |
| BK | ПЦ-80  | 1963 | 57 | female | 53,1  | 1,71 | 0,322 | 0,078 | 0 | 1 | 1 | 0 | 0 |
| BK | ПЦ-81  | 1984 | 36 | female | 70,8  | 2,14 | 0,444 | 0,333 | 0 | 2 | 0 | 0 | 0 |
| BK | ПЦ-82  | 1962 | 58 | female | 100,7 | 2,71 | 1,934 | 2,171 | 2 | 2 | 1 | 0 | 1 |
| BK | ПЦ-83  | 1966 | 54 | male   | 77,1  | 1,71 | 0,193 | 0,125 | 0 | 2 | 0 | 0 | 0 |
| BK | ПЦ-84  | 1980 | 40 | male   | 77,4  | 3,00 | 1,278 | 1,258 | 0 | 2 | 0 | 1 | 0 |
| BK | ПЦ-86  | 1959 | 61 | female | 60    | 2,14 | 0,998 | 1,228 | 0 | 2 | 1 | 0 | 0 |
| BK | ПЦ-87  | 1950 | 70 | female | 60    | 2,71 | 1,985 | 1,922 | 0 | 1 | 0 | 0 | 0 |
| BK | ПЦ-88  | 1977 | 43 | female | 69,3  | 2,14 | 0,516 | 0,346 | 0 | 1 | 1 | 0 | 0 |
| BK | ПЦ-89  | 1970 | 50 | female | 60    | 3,14 | 1,926 | 1,436 | 0 | 2 | 0 | 0 | 0 |
| BK | ПЦ-90  | 1966 | 54 | female | 60    | 2,00 | 0,159 | 0,072 | 1 | 1 | 0 | 0 | 0 |
| BK | ПЦ-91  | 1968 | 52 | female | 69,3  | 2,71 | 1,719 | 1,664 | 0 | 2 | 1 | 0 | 1 |
| BK | ПЦ-93  | 1987 | 33 | female | 73,4  | 1,71 | 0,279 | 0,200 | 1 | 1 | 0 | 0 | 0 |
| AG | ПЦ-120 | 1956 | 64 | male   | 61    | 1,14 | 0,620 | 0,479 | 1 | 0 | 1 | 1 | 0 |
| AG | ПЦ-122 | 1959 | 61 | male   | 63    | 1,86 | 0,307 | 2,510 | 1 | 2 | 2 | 1 | 1 |
| AG | ПЦ-123 | 1976 | 44 | female | 59    | 1,86 | 1,059 | 4,841 | 1 | 1 | 0 | 0 | 1 |
| AG | ПЦ-124 | 1978 | 42 | male   | 79    | 1,14 | 0,356 | 1,888 | 0 | 1 | 0 | 1 | 1 |
| AG | ПЦ-126 | 1970 | 50 | male   | 76    | 1,86 | 0,255 | 2,080 | 0 | 1 | 1 | 0 | 0 |
| AG | ПЦ-127 | 1959 | 61 | female | 125   | 1,57 | 0,155 | 2,294 | 1 | 1 | 0 | 0 | 1 |
| AG | ПЦ-128 | 1948 | 72 | male   | 55    | 2,29 | 1,371 | 7,343 | 0 | 2 | 1 | 0 | 0 |

|    |         |       |    |        |      |      |       |       |   |   |   |   |   |
|----|---------|-------|----|--------|------|------|-------|-------|---|---|---|---|---|
| AG | III-129 | 19 97 | 23 | male   | 71   | 1,14 | 0,216 | 2,475 | 0 | 0 | 1 | 0 | 0 |
| AG | III-130 | 19 65 | 55 | female | 65   | 2,14 | 0,642 | 4,547 | 1 | 0 | 0 | 0 | 0 |
| AG | III-131 | 19 68 | 52 | male   | 70   | 1,57 | 0,258 | 2,981 | 0 | 0 | 0 | 1 | 1 |
| AG | III-132 | 19 56 | 64 | male   | 64   | 1,57 | 0,439 | 2,418 | 0 | 0 | 0 | 0 | 1 |
| AG | III-133 | 19 74 | 46 | female | 59   | 1,00 | 1,016 | 2,002 | 2 | 1 | 0 | 0 | 1 |
| AG | III-134 | 19 84 | 36 | female | 63,4 | 1,29 | 0,220 | 1,314 | 2 | 0 | 0 | 0 | 0 |
| AG | III-136 | 19 52 | 68 | female | 53,1 | 2,00 | 0,588 | 5,004 | 1 | 1 | 0 | 0 | 0 |
| AG | III-137 | 19 88 | 32 | female | 67   | 1,29 | 0,362 | 0,770 | 0 | 0 | 0 | 0 | 0 |
| AG | III-138 | 19 85 | 35 | male   | 72   | 1,86 | 0,406 | 2,242 | 0 | 1 | 0 | 1 | 1 |
| AG | III-139 | 19 73 | 47 | female | 79   | 1,57 | 0,512 | 2,284 | 1 | 1 | 0 | 0 | 0 |
| AG | III-140 | 19 71 | 49 | male   | 68   | 1,57 | 0,595 | 2,654 | 1 | 1 | 0 | 0 | 0 |
| AG | III-142 | 19 95 | 25 | male   | 70   | 1,57 | 0,578 | 2,578 | 1 | 2 | 0 | 0 | 0 |
| AG | III-143 | 19 58 | 62 | female | 56   | 1,43 | 0,332 | 3,612 | 0 | 2 | 0 | 0 | 0 |
| AG | III-144 | 19 58 | 62 | female | 58   | 1,29 | 0,413 | 0,842 | 0 | 1 | 0 | 0 | 0 |
| EB | III-173 | 19 56 | 65 | female | 90   | 1,00 | 0,017 | 0,212 | 1 | 0 | 0 | 0 | 0 |
| EB | III-174 | 19 43 | 78 | female | 56   | 1,57 | 0,120 | 0,253 | 2 | 0 | 1 | 0 | 0 |
| EB | III-176 | 19 64 | 57 | female | 88   | 2,29 | 0,085 | 1,024 | 2 | 0 | 0 | 0 | 0 |
| EB | III-177 | 19 75 | 46 | female | 67   | 0,57 | 0,009 | 0,326 | 2 | 0 | 0 | 0 | 0 |
| EB | III-179 | 19 81 | 40 | female | 76   | 1,43 | 0,033 | 0,999 | 1 | 1 | 0 | 0 | 0 |
| EB | III-182 | 19 98 | 23 | male   | 75   | 1,14 | 0,021 | 0,254 | 2 | 1 | 1 | 1 | 1 |
| EB | III-183 | 19 91 | 30 | male   | 73   | 1,14 | 0,021 | 0,261 | 1 | 2 | 1 | 1 | 0 |

|            |        |      |    |        |     |      |       |       |   |   |   |   |   |
|------------|--------|------|----|--------|-----|------|-------|-------|---|---|---|---|---|
| EB         | ПЦ-184 | 1957 | 64 | female | 67  | 2,57 | 0,158 | 1,453 | 2 | 2 | 2 | 0 | 0 |
| EB         | ПЦ-186 | 1986 | 35 | female | 72  | 1,86 | 0,153 | 1,587 | 2 | 0 | 1 | 0 | 0 |
| EB         | ПЦ-187 | 1954 | 67 | male   | 80  | 1,00 | 0,019 | 0,238 | 1 | 1 | 0 | 1 | 0 |
| EB         | ПЦ-190 | 1978 | 43 | female | 55  | 2,29 | 0,101 | 1,097 | 2 | 1 | 1 | 1 | 0 |
| Karakestik | УЖ-1   | 1962 | 59 | female | 63  | 0,00 | 0,001 | 0,136 | 0 | 0 | 0 | 0 | 1 |
| Karakestik | УЖ-2   | 1947 | 74 | female | 82  | 0,00 | 0,000 | 0,006 | 0 | 1 | 0 | 1 | 1 |
| Karakestik | УЖ-3   | 1977 | 44 | female | 73  | 0,00 | 0,000 | 0,082 | 0 | 1 | 0 | 0 | 1 |
| Karakestik | УЖ-4   | 1961 | 60 | female | 85  | 0,00 | 0,000 | 0,054 | 0 | 0 | 0 | 0 | 0 |
| Karakestik | УЖ-5   | 1982 | 39 | female | 60  | 0,00 | 0,000 | 0,082 | 0 | 2 | 0 | 0 | 1 |
| Karakestik | УЖ-6   | 1964 | 57 | female | 59  | 0,00 | 0,000 | 0,059 | 0 | 1 | 1 | 0 | 0 |
| Karakestik | УЖ-7   | 1963 | 58 | female | 75  | 0,00 | 0,001 | 0,098 | 0 | 0 | 1 | 0 | 0 |
| Karakestik | УЖ-8   | 1981 | 40 | male   | 100 | 0,00 | 0,000 | 0,132 | 1 | 0 | 0 | 1 | 0 |
| Karakestik | УЖ-9   | 1939 | 82 | female | 60  | 0,00 | 0,000 | 0,042 | 0 | 1 | 0 | 0 | 0 |
| Karakestik | УЖ-10  | 1997 | 24 | female | 48  | 0,00 | 0,001 | 0,344 | 0 | 1 | 0 | 0 | 0 |
| Karakestik | УЖ-11  | 1990 | 31 | female | 60  | 0,00 | 0,001 | 0,287 | 1 | 1 | 0 | 0 | 0 |
| Karakestik | УЖ-12  | 1984 | 37 | female | 73  | 0,00 | 0,000 | 0,021 | 0 | 1 | 0 | 0 | 0 |
| Karakestik | УЖ-13  | 1994 | 27 | female | 54  | 0,00 | 0,000 | 0,052 | 0 | 1 | 0 | 0 | 0 |



[illegible]

|           |       |      |    |         |    |      |       |       |   |   |   |   |   |
|-----------|-------|------|----|---------|----|------|-------|-------|---|---|---|---|---|
| Umb etaly | УЖ-30 | 1976 | 45 | fem ale | 57 | 0,00 | 0,000 | 0,375 | 0 | 0 | 0 | 0 | 0 |
| Umb etaly | УЖ-31 | 1997 | 24 | mal e   | 56 | 0,00 | 0,000 | 0,115 | 0 | 2 | 0 | 1 | 0 |
| Umb etaly | УЖ-32 | 1975 | 46 | mal e   | 83 | 0,00 | 0,000 | 0,058 | 0 | 2 | 0 | 0 | 0 |
| Umb etaly | УЖ-33 | 1980 | 41 | fem ale | 68 | 0,00 | 0,000 | 0,148 | 1 | 1 | 0 | 0 | 0 |
| Umb etaly | УЖ-34 | 1999 | 22 | fem ale | 61 | 0,00 | 0,000 | 0,126 | 0 | 1 | 0 | 0 | 0 |
| Umb etaly | УЖ-35 | 1957 | 64 | mal e   | 82 | 0,00 | 0,000 | 0,244 | 1 | 2 | 0 | 0 | 0 |
| Umb etaly | УЖ-36 | 1961 | 60 | fem ale | 67 | 0,00 | 0,000 | 0,071 | 0 | 1 | 0 | 0 | 1 |
| Umb etaly | УЖ-37 | 1973 | 48 | fem ale | 70 | 0,00 | 0,000 | 0,191 | 0 | 1 | 0 | 0 | 0 |
| Umb etaly | УЖ-38 | 1974 | 47 | mal e   | 86 | 0,00 | 0,001 | 0,377 | 0 | 0 | 0 | 1 | 0 |
| Umb etaly | УЖ-39 | 1973 | 48 | fem ale | 87 | 0,00 | 0,001 | 0,255 | 1 | 1 | 0 | 0 | 0 |
| Umb etaly | УЖ-40 | 1990 | 31 | mal e   | 90 | 0,00 | 0,000 | 0,044 | 0 | 0 | 0 | 1 | 0 |
| Umb etaly | УЖ-41 | 1990 | 31 | mal e   | 64 | 0,00 | 0,001 | 0,258 | 0 | 0 | 1 | 1 | 1 |
| Umb etaly | УЖ-42 | 1993 | 28 | mal e   | 54 | 0,00 | 0,000 | 0,158 | 0 | 0 | 0 | 1 | 1 |
| Umb etaly | УЖ-43 | 1991 | 30 | fem ale | 63 | 0,00 | 0,000 | 0,117 | 1 | 2 | 0 | 0 | 0 |
| Umb etaly | УЖ-44 | 1996 | 25 | fem ale | 70 | 0,00 | 0,000 | 0,094 | 0 | 1 | 1 | 0 | 0 |
| Umb etaly | УЖ-45 | 1988 | 33 | fem ale | 70 | 0,00 | 0,000 | 0,117 | 0 | 1 | 0 | 0 | 0 |
| Umb etaly | УЖ-46 | 1983 | 38 | fem ale | 51 | 0,00 | 0,000 | 0,060 | 0 | 1 | 0 | 0 | 0 |
| Umb etaly | УЖ-47 | 1994 | 27 | fem ale | 58 | 0,00 | 0,000 | 0,330 | 0 | 1 | 0 | 0 | 0 |
| Umb etaly | УЖ-48 | 1990 | 31 | fem ale | 60 | 0,00 | 0,000 | 0,077 | 0 | 1 | 0 | 0 | 0 |
| Umb etaly | УЖ-49 | 1957 | 64 | mal e   | 58 | 0,00 | 0,000 | 0,193 | 0 | 1 | 0 | 1 | 0 |
| Umb etaly | УЖ-50 | 1985 | 36 | fem ale | 65 | 0,00 | 0,000 | 0,217 | 0 | 2 | 0 | 0 | 0 |

Table S2: MPC data for pesticides in European Union and Customs Union.

| Pesticide classes  | MPC standards of the European Union (mg/kg) | MPC standards of the Customs Union (mg/kg) |
|--------------------|---------------------------------------------|--------------------------------------------|
| HCB                | 0,01                                        | no data                                    |
| $\alpha$ HCH       | 0,01                                        | 0,05                                       |
| $\gamma$ HCH       | 0,01                                        | 0,05                                       |
| $\beta$ HCH        | 0,01                                        | 0,05                                       |
| Heptachlor         | 0,01                                        | no data                                    |
| $\delta$ HCH       | 0,01                                        | 0,05                                       |
| Aldrin             | 0,01                                        | no data                                    |
| Keltan             | 0,02                                        | 0,01                                       |
| Heptachlor epoxide | 0,01                                        | no data                                    |
| Chlordane          | 0,01                                        | 0,02                                       |
| Endosulfan 1       | 0,05                                        | no data                                    |
| DDE                | 0,05                                        | 0,01                                       |
| Dieldrin           | 0,01                                        | no data                                    |
| 2,4-DDD            | 0,05                                        | no data                                    |
| Chlorobenzylate    | 0,02                                        | no data                                    |
| DDD                | 0,01                                        | 0,01                                       |
| Endrin             | 0,01                                        | 0,05                                       |
| Endosulfan 2       | 0,05                                        | no data                                    |
| DDT                | 0,05                                        | 0,01                                       |
| Endrin aldehyde    | 0,01                                        | no data                                    |
| Endosulfan sulfate | 0,05                                        | no data                                    |
| Dibutylendan       | no data                                     | no data                                    |
| Metoxychlor        | 0,01                                        | no data                                    |
| Hexabromobenzene   | 0,01                                        | no data                                    |

Figure S2: An example of primary data processing using Illumina GenomeStudio v.2.05 software.

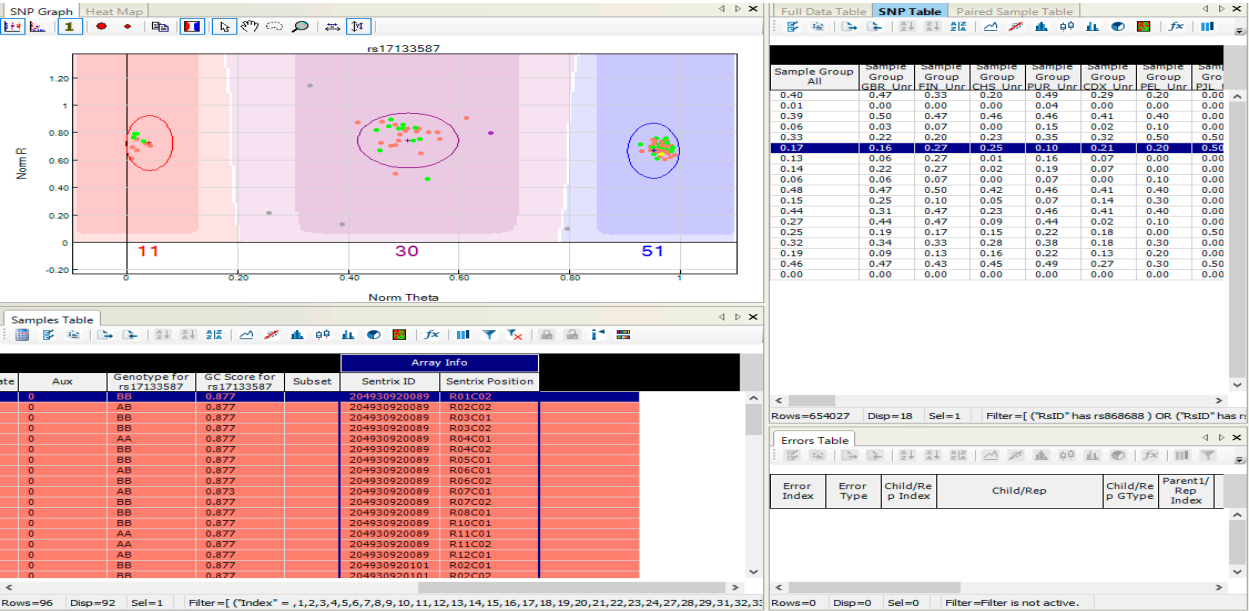

Figure S3: An example of genotyping and annotation processing.

The figure shows a screenshot of a Microsoft Excel spreadsheet containing a large table of genotyping and annotation data. The table has columns for various genomic features and annotations. The data is organized into rows, with some rows highlighted in green. The table includes columns for Site, Aux, Genotype for rs17133587, GC Score for rs17133587, Subset, Satrix ID, and Satrix Position. The table also includes columns for Error Index, Error Type, Child/Rep Index, Child/Rep, Child/Rep Index, Parent/Rep Index, and Parent/Rep. The table is titled '472\_Samples\_PCF\_21.09.22.xlsx - Excel'.

Table S3: Characteristics of functions of genes selected for study of pesticides effects on health.

| Gene/Genes         | Function and description |
|--------------------|--------------------------|
| Detoxication genes |                          |

|                  |                                                                                                                                                                                                                                                                                                                                                                                                                                                                                                                                                                                                                                                                                                                                                                                                                                                                                                                                                    |
|------------------|----------------------------------------------------------------------------------------------------------------------------------------------------------------------------------------------------------------------------------------------------------------------------------------------------------------------------------------------------------------------------------------------------------------------------------------------------------------------------------------------------------------------------------------------------------------------------------------------------------------------------------------------------------------------------------------------------------------------------------------------------------------------------------------------------------------------------------------------------------------------------------------------------------------------------------------------------|
| <i>GST genes</i> | Glutathione S-transferases (GSTs) are important metabolic enzymes of phase II biotransformation. GSTs, including GSTM1, GSTT1, and GSTP1, play an important role in the detoxification of a wide range of xenobiotics, including carcinogens such as benzene, organochlorines, organophosphates, pesticides, tobacco smoke, chemotherapeutic agents, and reactive oxygen species. Polymorphisms of the GSTT1 and GSTP1 genes are associated with several malignancies, including leukemia and lymphoma. GSTs act by catalyzing the reaction of glutathione with an acceptor molecule to form S-substituted glutathione (S indicates sulfur). Individuals with a deletion of GSTM1 and GSTT1 may have an impaired ability to metabolically excrete organochlorine pesticides, which may affect hormonal homeostasis. This leads to an increased risk of hypospadias.                                                                                |
| <i>CYP1A1</i>    | CYP1A1 (aryl hydrocarbon hydroxylase) is involved in Phase I of xenobiotic and drug metabolism. The <i>CYP1A1</i> gene plays a key role in the activation of many pro-carcinogens, including polycyclic aromatic hydrocarbons and aromatic amines produced in tobacco-related products. <i>CYP1A1</i> gene is associated with the development of cancer and a number of other diseases, such as arthritis, allergies, allergic dermatitis, miscarriages, etc. The pesticide dicofol enhances the metabolism of 7-ethoxyresorufin, pentoxyresorufin, aniline, and erythromycin, which are selective substrates for CYP1A1, CYP2B, CYP2E1, and CYP3A. There is evidence of the involvement of the AhR/CYP1A1 signaling pathway in the mechanism of action of the pesticides DDT and DDE in the human placenta.                                                                                                                                       |
| <i>CYP2B6</i>    | Highly inducible and polymorphic enzyme that is expressed in the brain, mainly in neurons and astrocytes. It metabolizes not only clinically important drugs (e.g., bupropion, cyclophosphamide, efavirenz, propofol, and selegiline) but also many chemicals. Transcription of human CYP2B6 is directly regulated by the human pregnane X receptor (PXR). Transactivation of CYP2B6 by PXR is mediated by a region of the PBREM gene. This 51 bp amplifier module regulates constitutive androstane receptor (CAR)-mediated CYP2B6 induction. CYP2B6 has also been confirmed to be involved in the bioactivation of the pesticide chlorpyrifos (CPF). CYP2B6 variants have the potential to alter the balance of CPF metabolism and thus are likely biomarkers of susceptibility to this pesticide.                                                                                                                                               |
| <i>CYP2C19</i>   | Polymorphic gene with over 30 different alleles. CYP2C19 is responsible for the metabolism of 10% of drugs commonly prescribed in the clinical setting; for example, omeprazole, lansoprazole, and the anticonvulsant mephenytoin. Among all ethnic groups, Asians have a higher frequency of individuals who poorly metabolize CYP2C19. Some drugs, such as clopidogrel, are known to be less effective in some individuals belonging to Asian populations because they have a higher frequency of non-functional CYP2C19 alleles. In addition, human exposure to pesticides can provoke inhibition of this enzyme. For example, the chiral pesticide ethofumesate strongly inhibits CYP2C19 in vitro. Studies by Wendela A. Kappers et al. show that CYP2C19 is the main enzyme involved in the activation of diazinon in the human liver, while other enzymes, including CYP1A2, may play a minor role. Another pesticide, chlorpyrifos, can be |

|                               |                                                                                                                                                                                                                                                                                                                                                                                                                                                                                                                                                                                                                                                                                                                                                                                |
|-------------------------------|--------------------------------------------------------------------------------------------------------------------------------------------------------------------------------------------------------------------------------------------------------------------------------------------------------------------------------------------------------------------------------------------------------------------------------------------------------------------------------------------------------------------------------------------------------------------------------------------------------------------------------------------------------------------------------------------------------------------------------------------------------------------------------|
|                               | activated to a potent $\beta$ -esterase inhibitor by CYP2B6 or detoxified to dearylated metabolites by CYP2C19.                                                                                                                                                                                                                                                                                                                                                                                                                                                                                                                                                                                                                                                                |
| Antioxidant response genes    |                                                                                                                                                                                                                                                                                                                                                                                                                                                                                                                                                                                                                                                                                                                                                                                |
| <i>GCLC</i> and <i>GCLM</i>   | Glutathione tripeptide (GSH; $\gamma$ -glutamylcysteinylglycine) is one of the most distributed cellular thiols. GSH is a major player in cellular defense against ROS because it nonenzymatically scavenges both singlet oxygen and hydroxyl radicals and is used by glutathione peroxidase and glutathione transferases to limit the levels of certain reactive aldehydes and peroxides in the cell. It contains oxidative stress-sensitive elements in the promoter/enhancer region, and the GCLC gene polymorphisms associated with reduced GCLC expression are suggested to be important determinants of susceptibility to oxidative stress and DNA damage.                                                                                                               |
| <i>GPX4</i>                   | Glutathione peroxidase exists in at least five isoforms in humans, GPX1-5. Of these five types, GPX4 protects cells from membrane peroxidation and cell death by catalyzing the reduction of hydrogen peroxide and lipid peroxides at the expense of reduced glutathione, thereby protecting cells from oxidative stress. GPx4 is able to regenerate complex lipid peroxides such as phospholipid hydroperoxides even when integrated into highly structured lipid-protein complexes such as lipoproteins and membranes.                                                                                                                                                                                                                                                       |
| <i>SOD1</i>                   | SOD plays a vital role in homeostatic redox balance by scavenging oxygen radicals and thus protecting the cell from oxidative stress. Oxidative stress caused by pesticide exposure can lead to inhibition of SOD enzyme activity, leading to accumulation of superoxide radicals, which has recently been observed among agricultural workers exposed to organophosphate, pyrethroid pesticides, and redox-cyclic herbicides. Superoxide dismutase 1 (SOD1) is one of the most important enzymes involved in the control of cellular redox homeostasis due to its ability to catalyze the dismutation of superoxide anions into hydrogen peroxide and molecular oxygen. It is associated with a number of diseases, including cardiovascular disease and Parkinson's disease. |
| <i>NFE2L3</i>                 | The transcription factor NFE2L3 is involved in various cellular processes, including carcinogenesis, stress response, differentiation, and inflammation.                                                                                                                                                                                                                                                                                                                                                                                                                                                                                                                                                                                                                       |
| DNA repair genes              |                                                                                                                                                                                                                                                                                                                                                                                                                                                                                                                                                                                                                                                                                                                                                                                |
| <i>XRCC1</i> and <i>XRCC3</i> | The protein encoded by XRCC1 is involved in the efficient repair of DNA single-strand breaks formed by exposure to ionizing radiation and alkylating agents. This protein interacts with DNA ligase III, polymerase beta, and poly (ADP-ribose) polymerase to participate in the base excision repair pathway. XRCC3 encodes a member of the RecA/Rad51-related protein family that participates in homologous recombination to maintain chromosome stability and repair DNA damage. The polymorphism of these genes affects the activity of the proteins involved in the repair of DNA single-strand breaks, which increases the risk of developing a number of oncological diseases.                                                                                         |

|            |                                                                                                                                                                                                                     |
|------------|---------------------------------------------------------------------------------------------------------------------------------------------------------------------------------------------------------------------|
| <i>XPD</i> | The XPD protein responsible for helicase activity is involved in DNA excision repair and transcription initiation. Mutations in the XPD gene are associated with a decrease in the efficiency of DNA damage repair. |
|------------|---------------------------------------------------------------------------------------------------------------------------------------------------------------------------------------------------------------------|
